# Supplementary material for: Evolution and Development of Ventricular Septation in the Amniote Heart
Source: PubMed Central journal article supplement (PMC4156344; doi:10.1371/journal.pone.0106569), 2014-09-05

# Chicken HH27

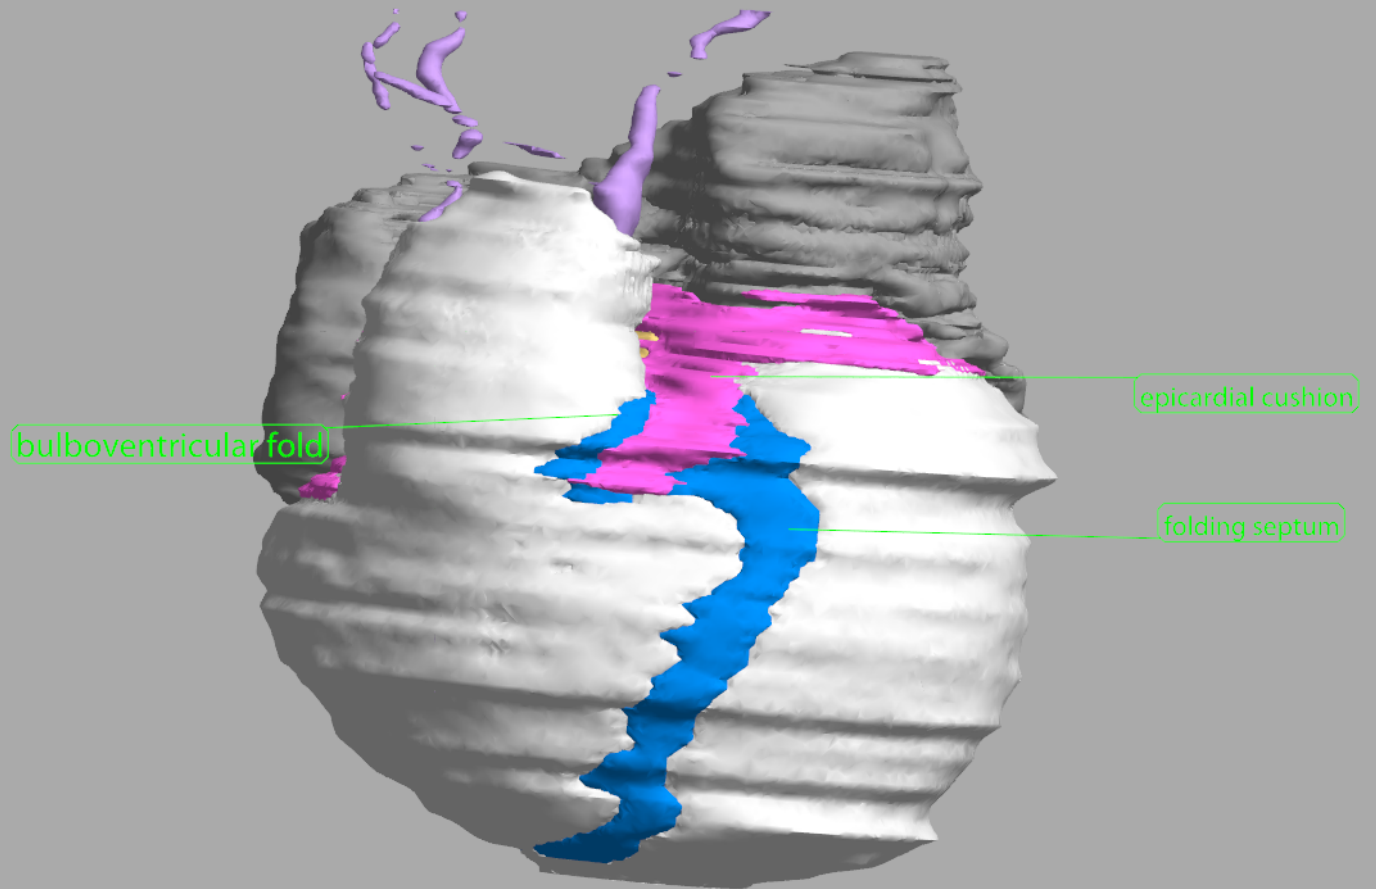

Supplement: pone.0106569.s003.pdf [file pone.0106569.s003.pdf]
